# Supplementary material
Source: Springer Nature journal article supplement (https://www.springermedizin.de/resource/supplementary/13058_2005_1249_MOESM6_ESM.pdf/9698678)
Supplement: MOESM6 [file 9698678]

**Table2. The relation of somatic mutation and gain of copy number of PIK3CA in breast cancer**

|              | <b>Mutation-</b> | <b>Mutation+</b> | <b>Total</b> |
|--------------|------------------|------------------|--------------|
| <b>Gain+</b> | 4                | 4                | 8            |
| <b>Gain-</b> | 69               | 15               | 84           |
| <b>Total</b> | 73               | 19               | 92           |

( Fisher exact test, *P* value = 0.054)
